# Supplementary material
Source: publisher site journal article supplement (https://www.dovepress.com/article/464981)
Supplement: Supplementary file 1 [file get_supplementary_file.php]

Layer-by-layer Nanoparticles for Calcium Overload in Situ Enhanced Reactive Oxygen Oncotherapy

Boye Zhang1,2, Jianliang Man3,4, Lingyun Guo1, Xiaoxia Ru1, Chengwu Zhang1,2, Wen Liu1,2,5, Lihong Li1,2,5, Sufang Ma1,2, Lixia Guo2,4, Haojiang Wang1,2, Bin Wang1,2, Haipeng Diao1,5, Renchao Che6,7,*, Lili Yan1,2,5,*

1School of Basic Medical Sciences, Shanxi Medical University, Taiyuan 030001, China

2Shanxi Province Brain Degenerative Diseases Precision Diagnosis and Treatment Engineering Research Center, Shanxi Medical University, Jinzhong 030606, China

3Academy of Medical Sciences, Shanxi Medical University, Taiyuan 030001, China

4College of Pharmacy, Shanxi Medical University, Taiyuan 030001, China

5Key Laboratory of Cellular Physiology, Ministry of Education, Shanxi Medical University, Taiyuan 030001, China

6Laboratory of Advanced Materials, Shanghai Key Lab of Molecular Catalysis and Innovative Materials, Academy for Engineering &Technology, Fudan University, Shanghai 200438, China

7Zhejiang Laboratory, Hangzhou 311100, China

**
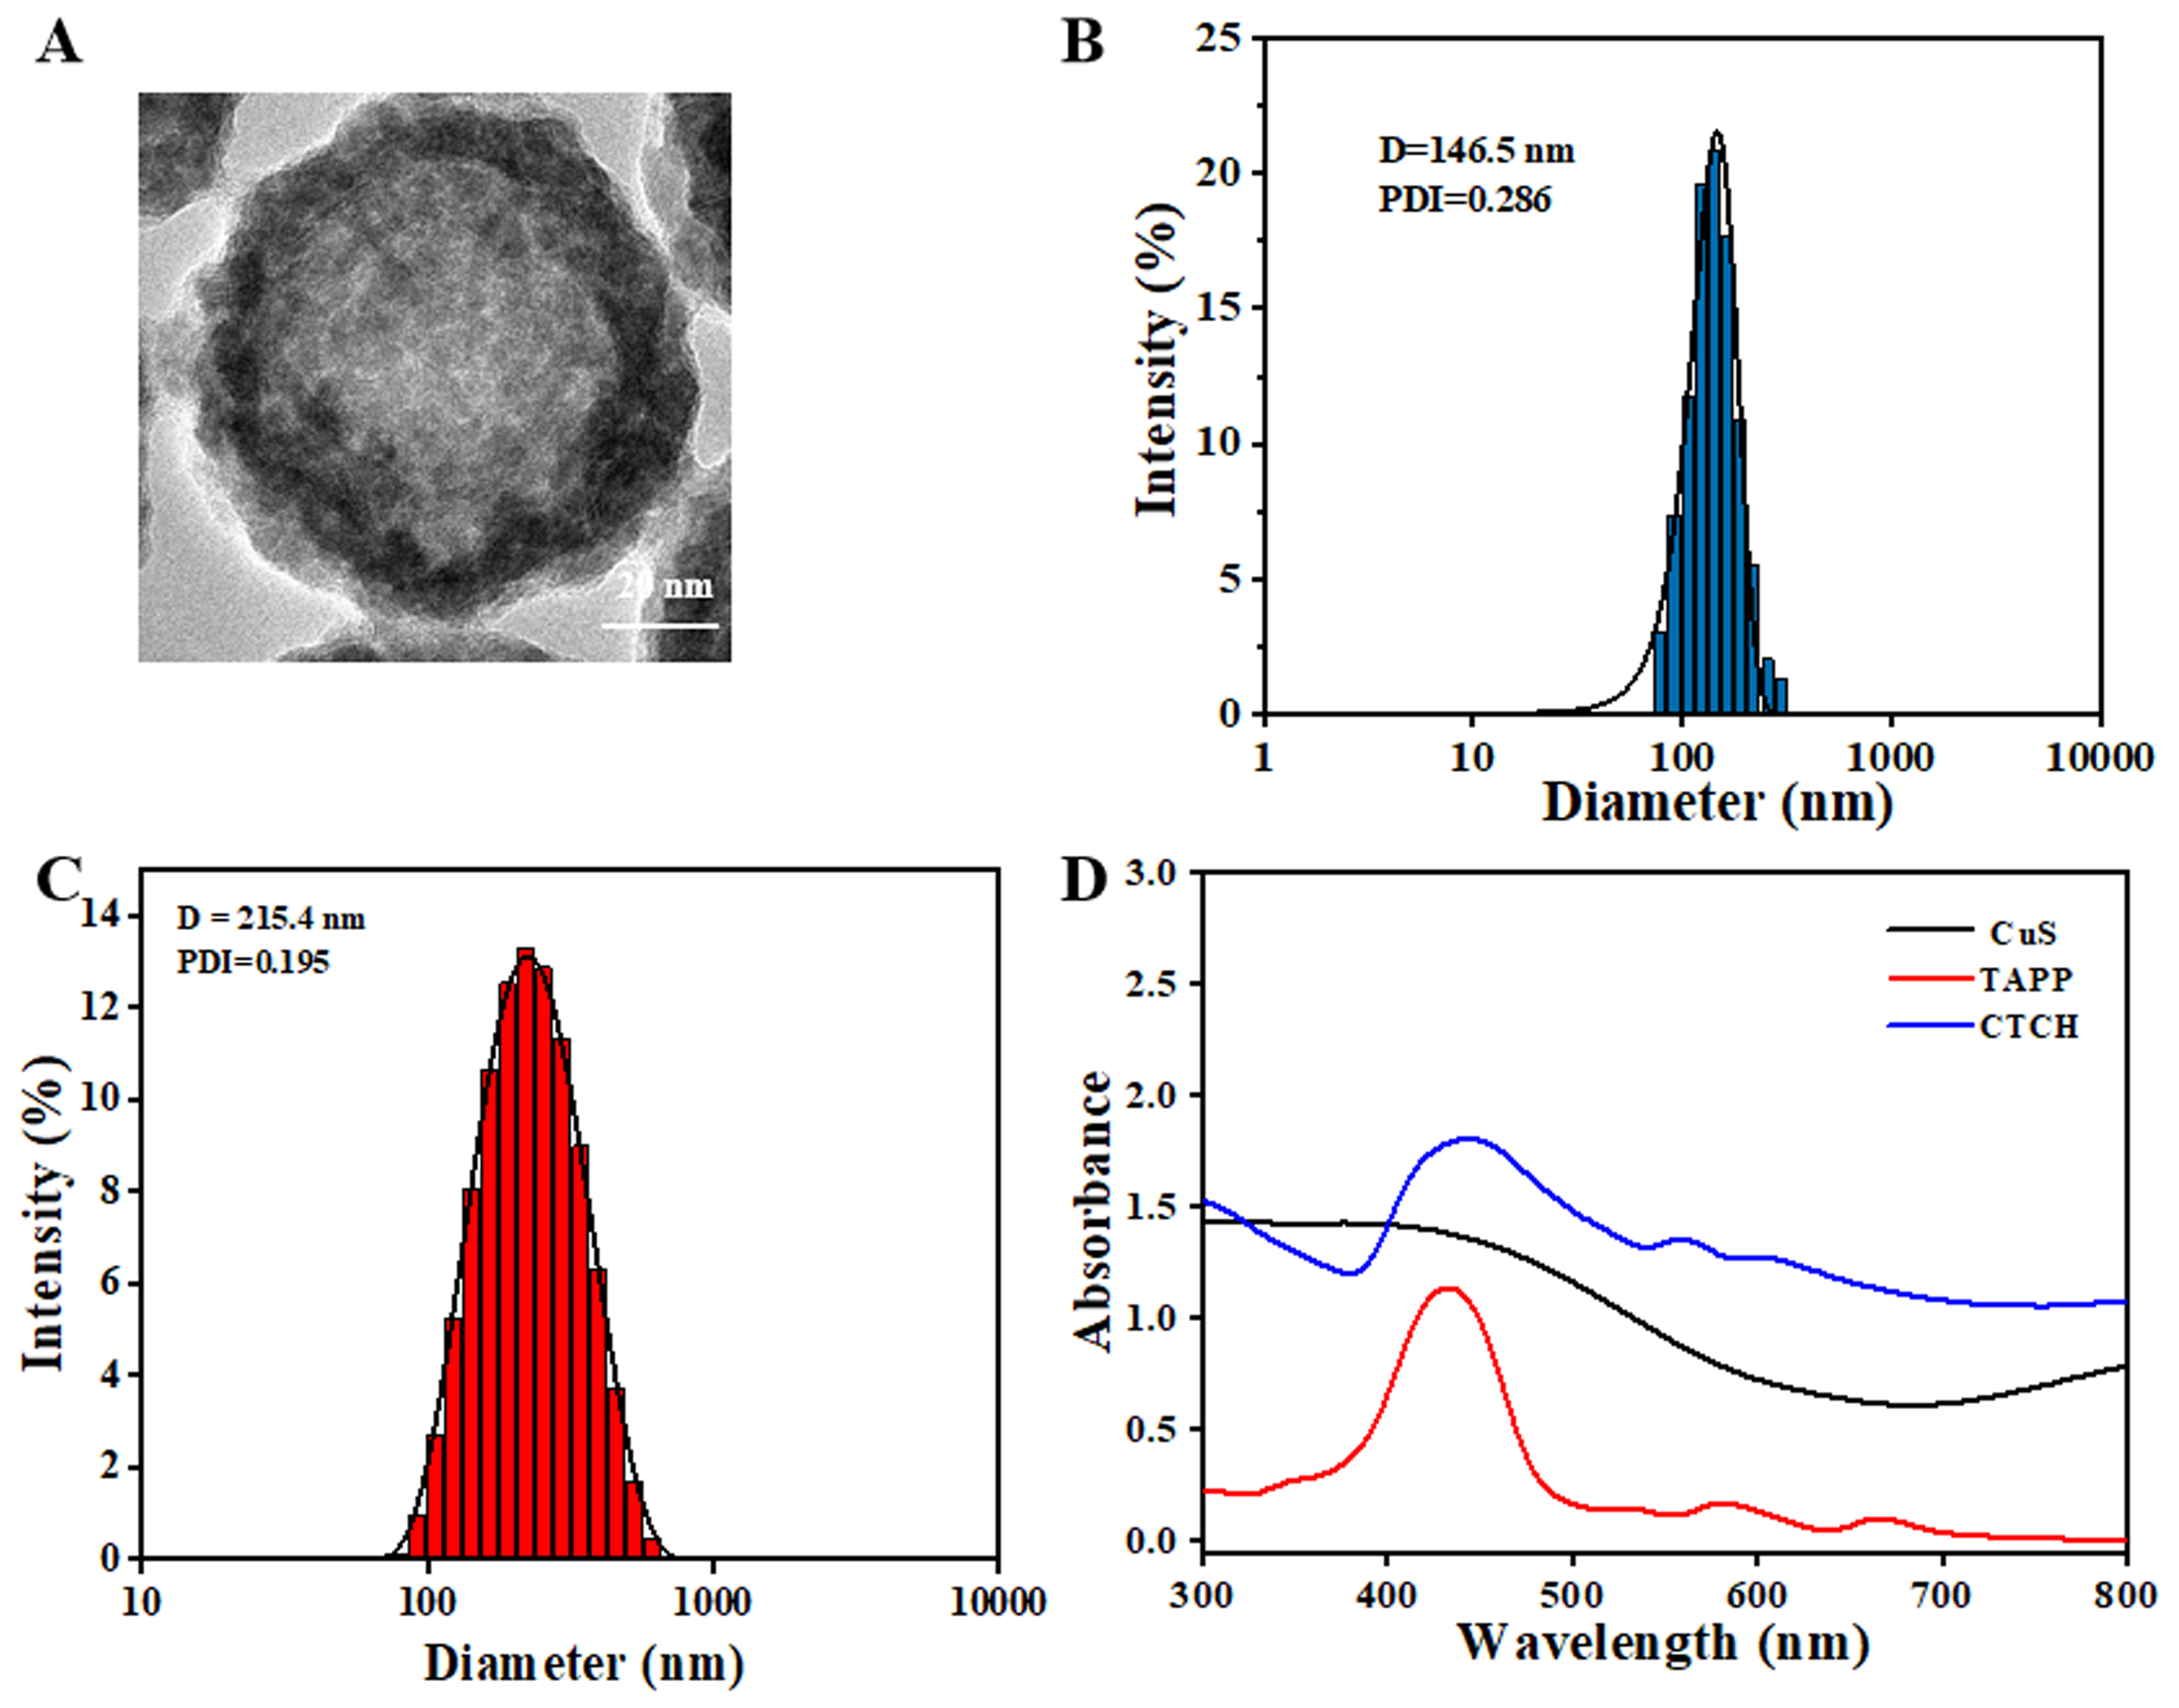
**

**Figure S1** (A) High-resolution TEM image of CuS (scale bar: 20 nm); (B) DLS diagram of CuS; (C) DLS diagram of CTCH; (D) UV-vis absorption spectra of CuS, TAPP and CTCH.

**
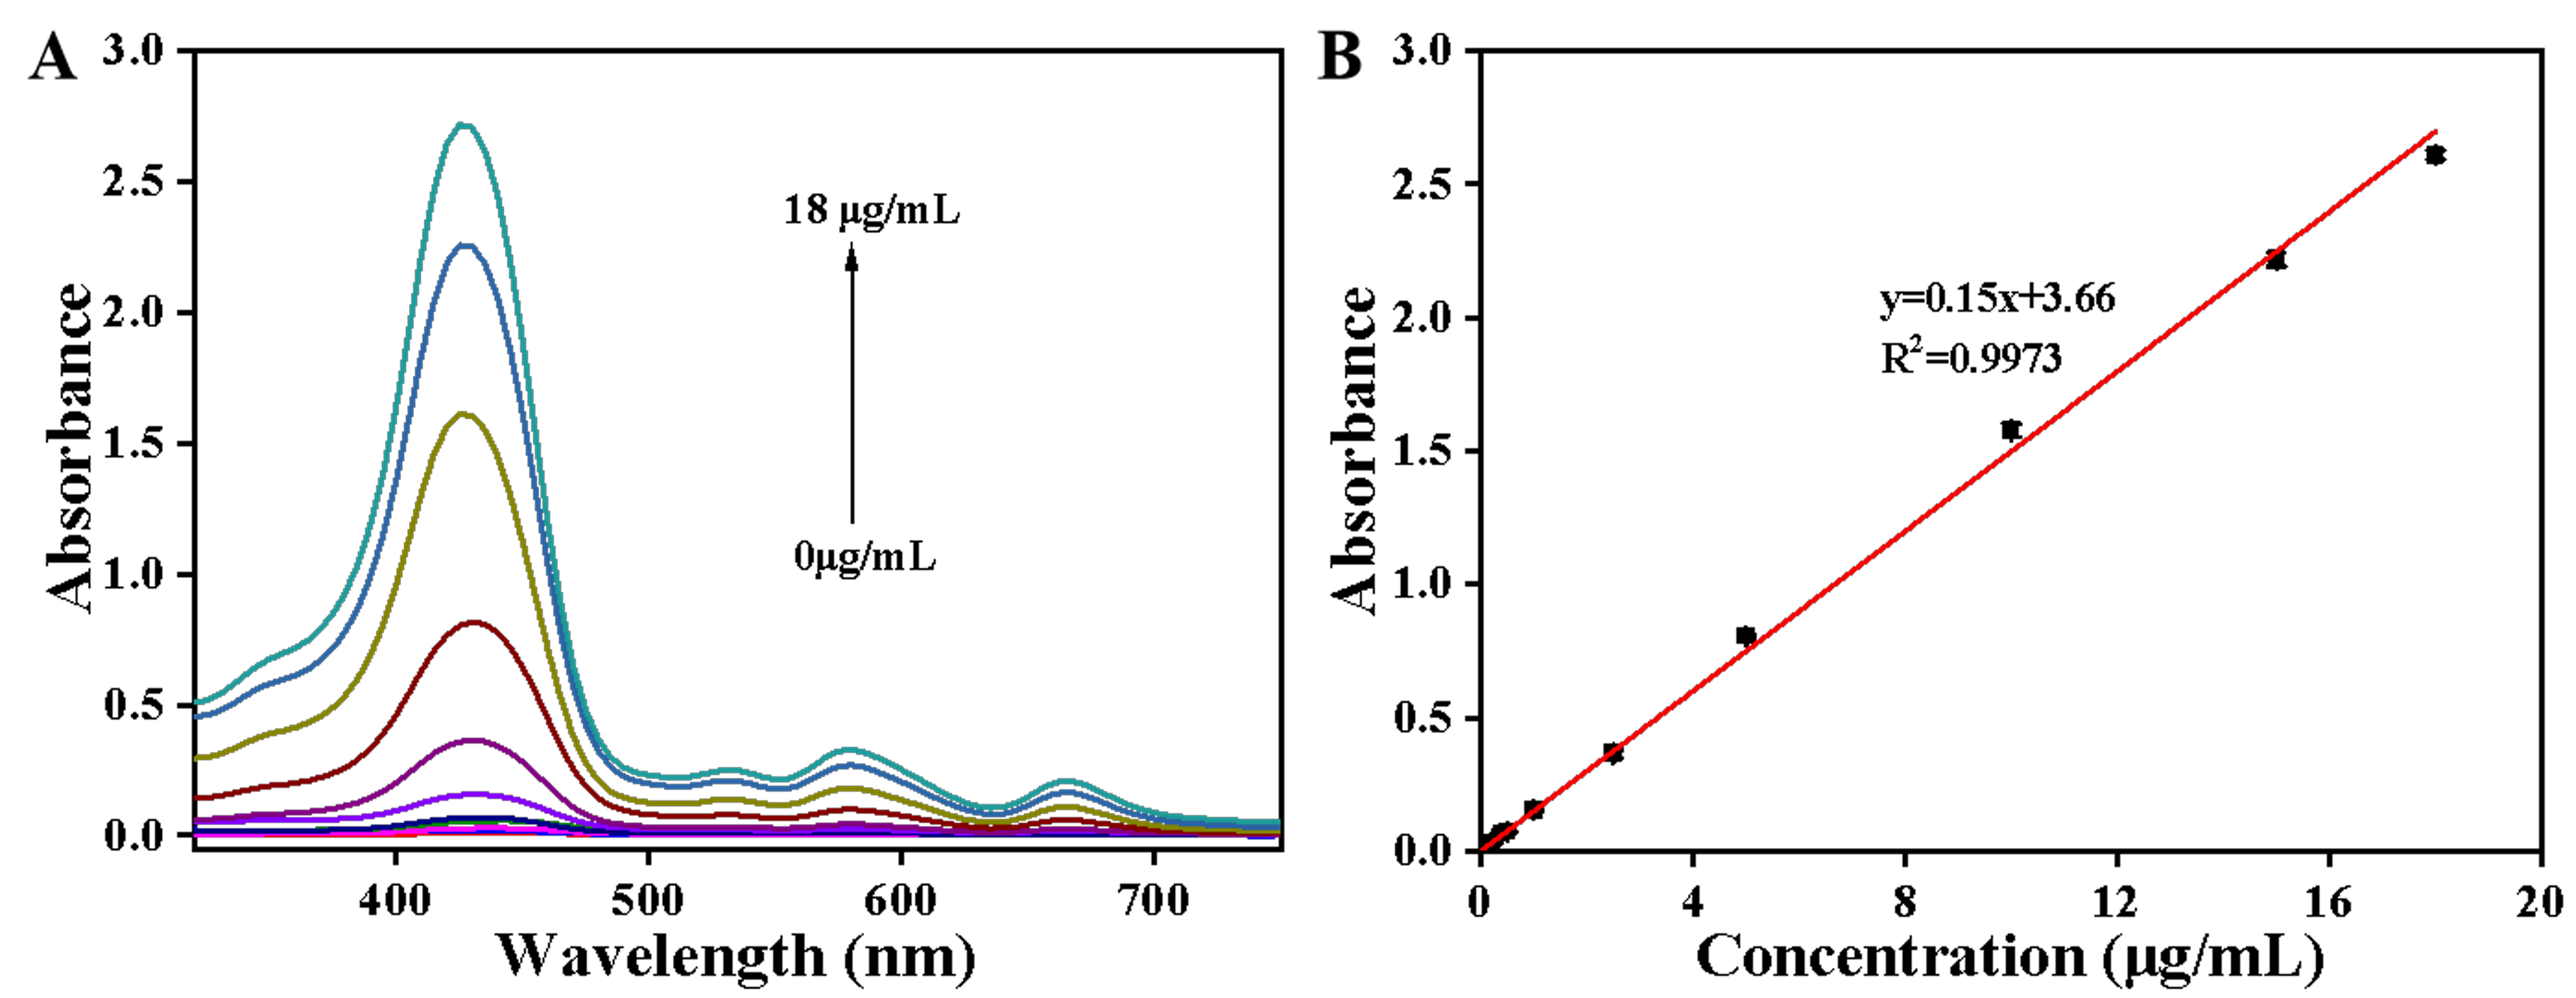
**

**Figure S2** (A) UV–vis absorption spectra of TAPP; (B) Linear correlation of TAPP against its corresponding concentrations (inset: the linear fitting equation).

**
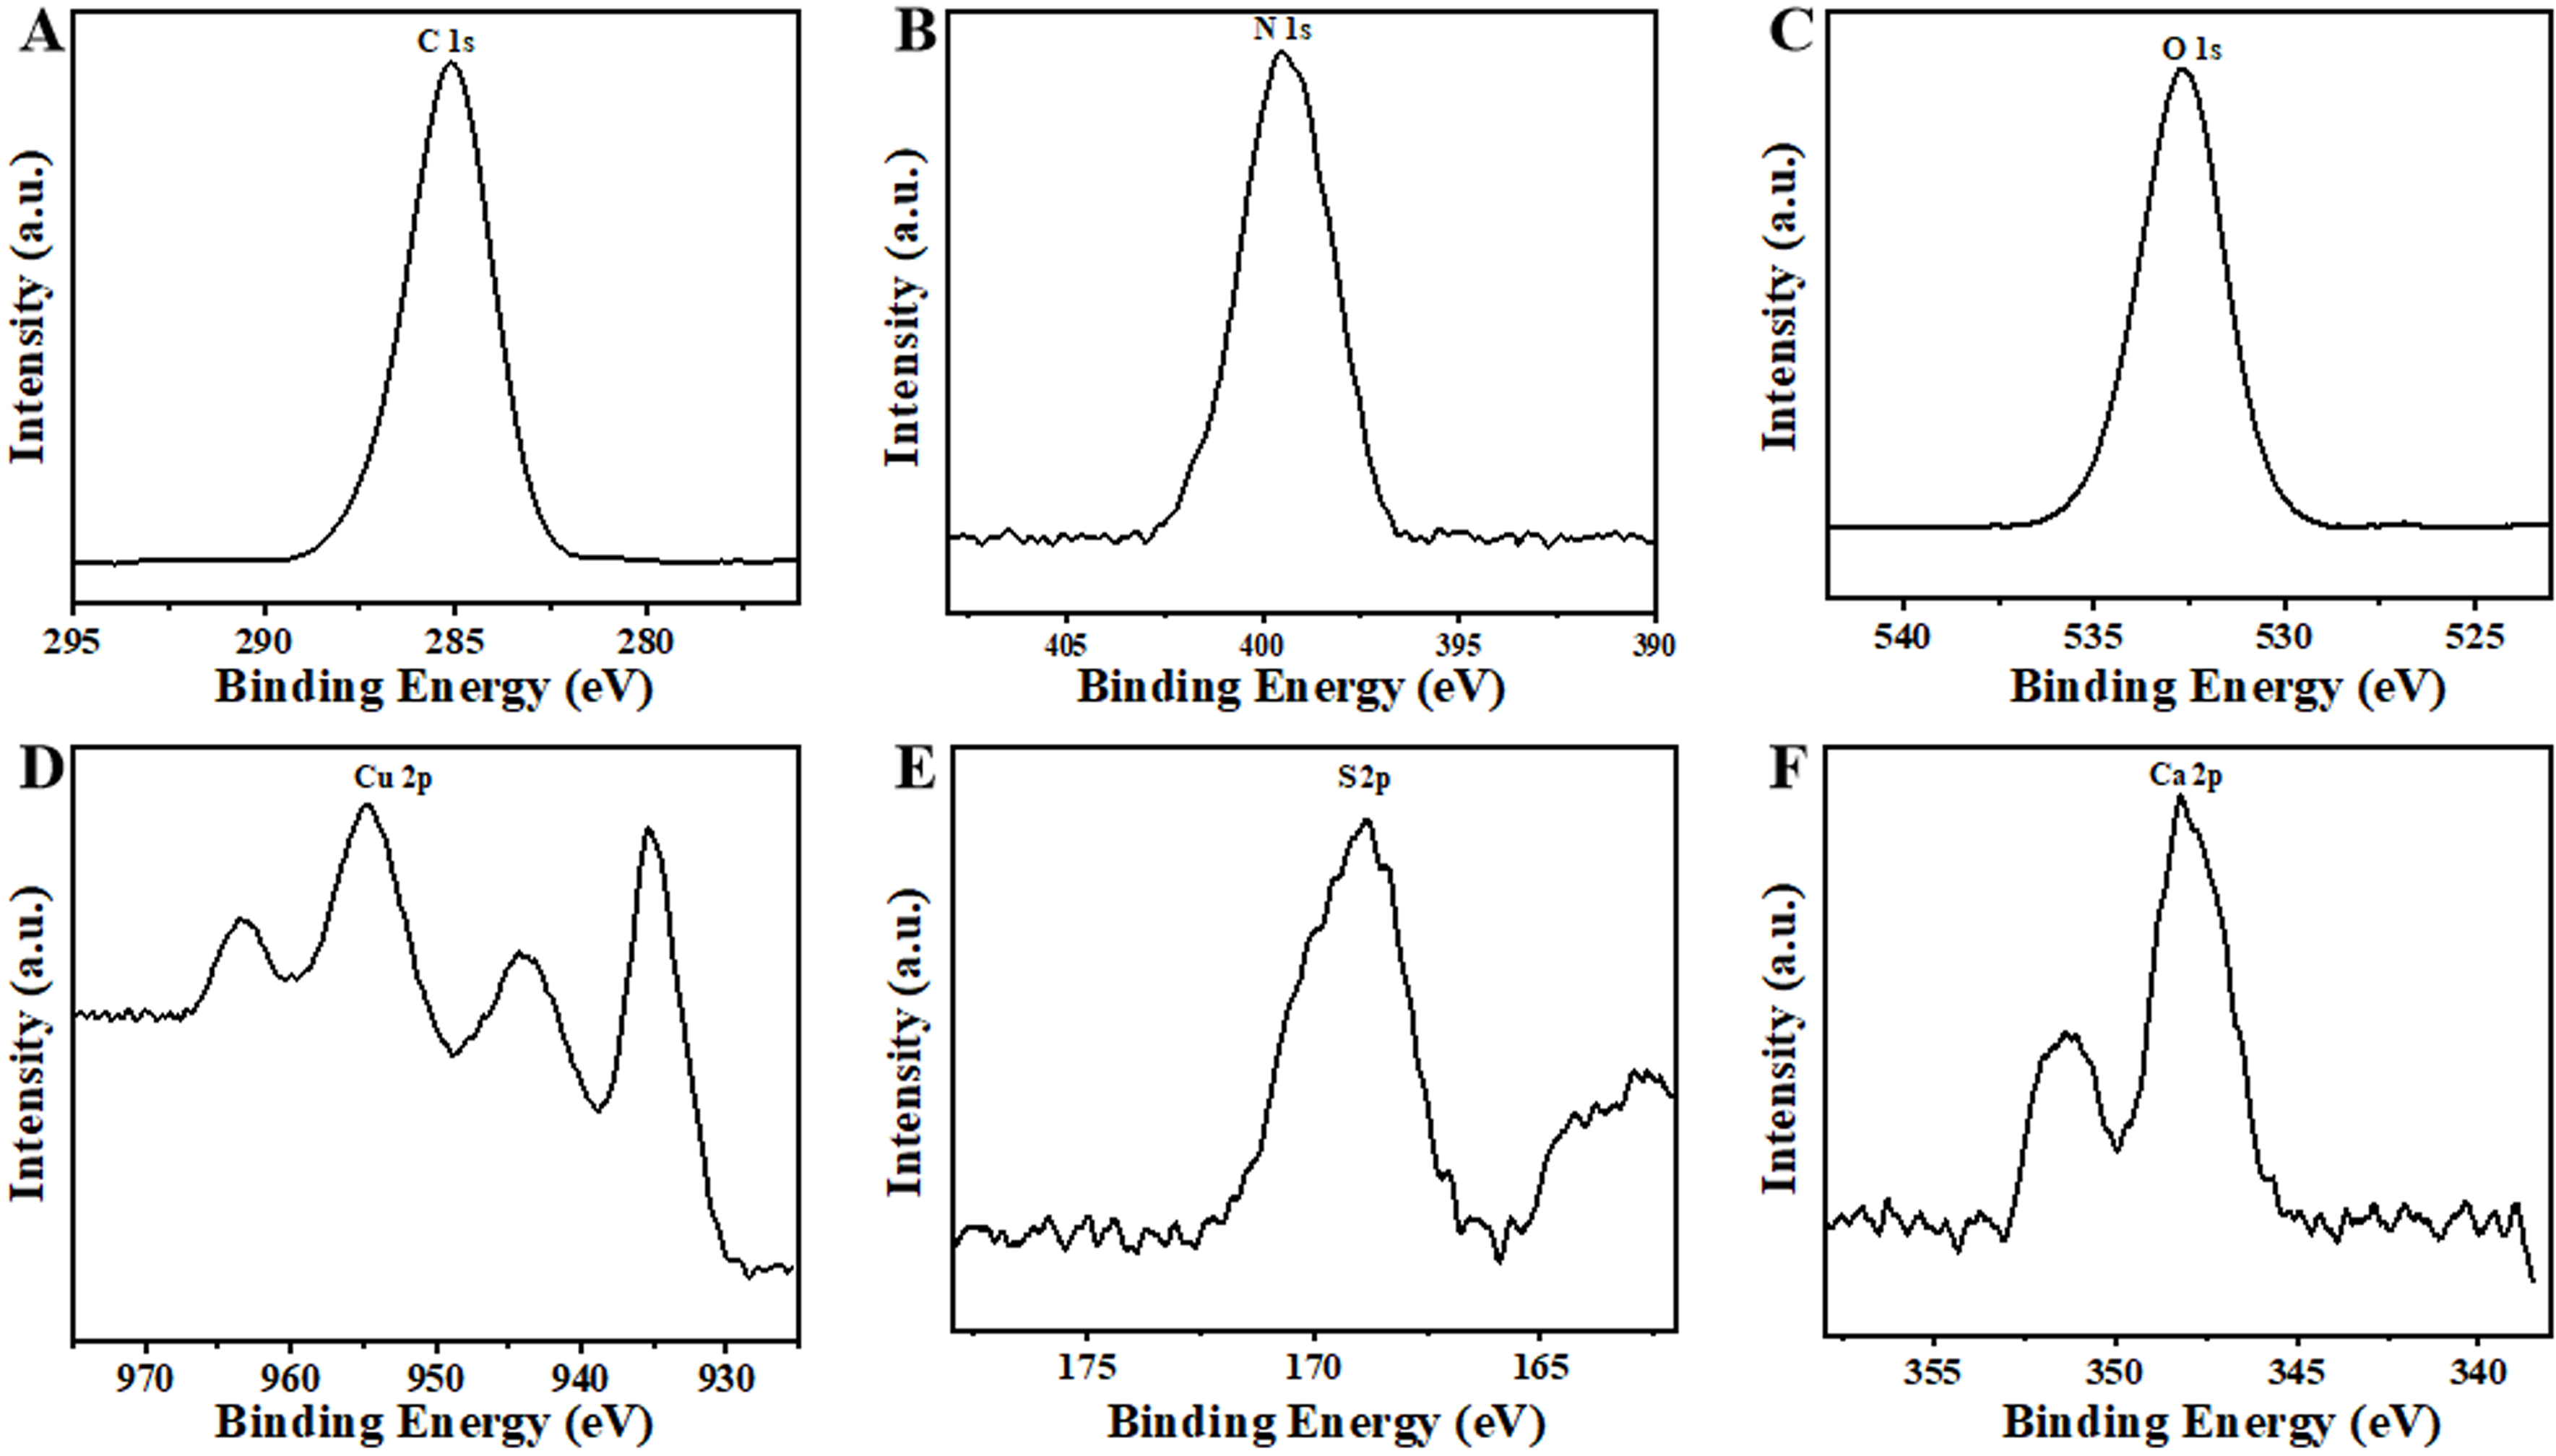
**

**Figure S3** XPS high-resolution scans of (A) C1s, (B) N1s, (C) O1s, (D) Cu2p, (E) S2p, and (F) Ca2p in CTCH.

**
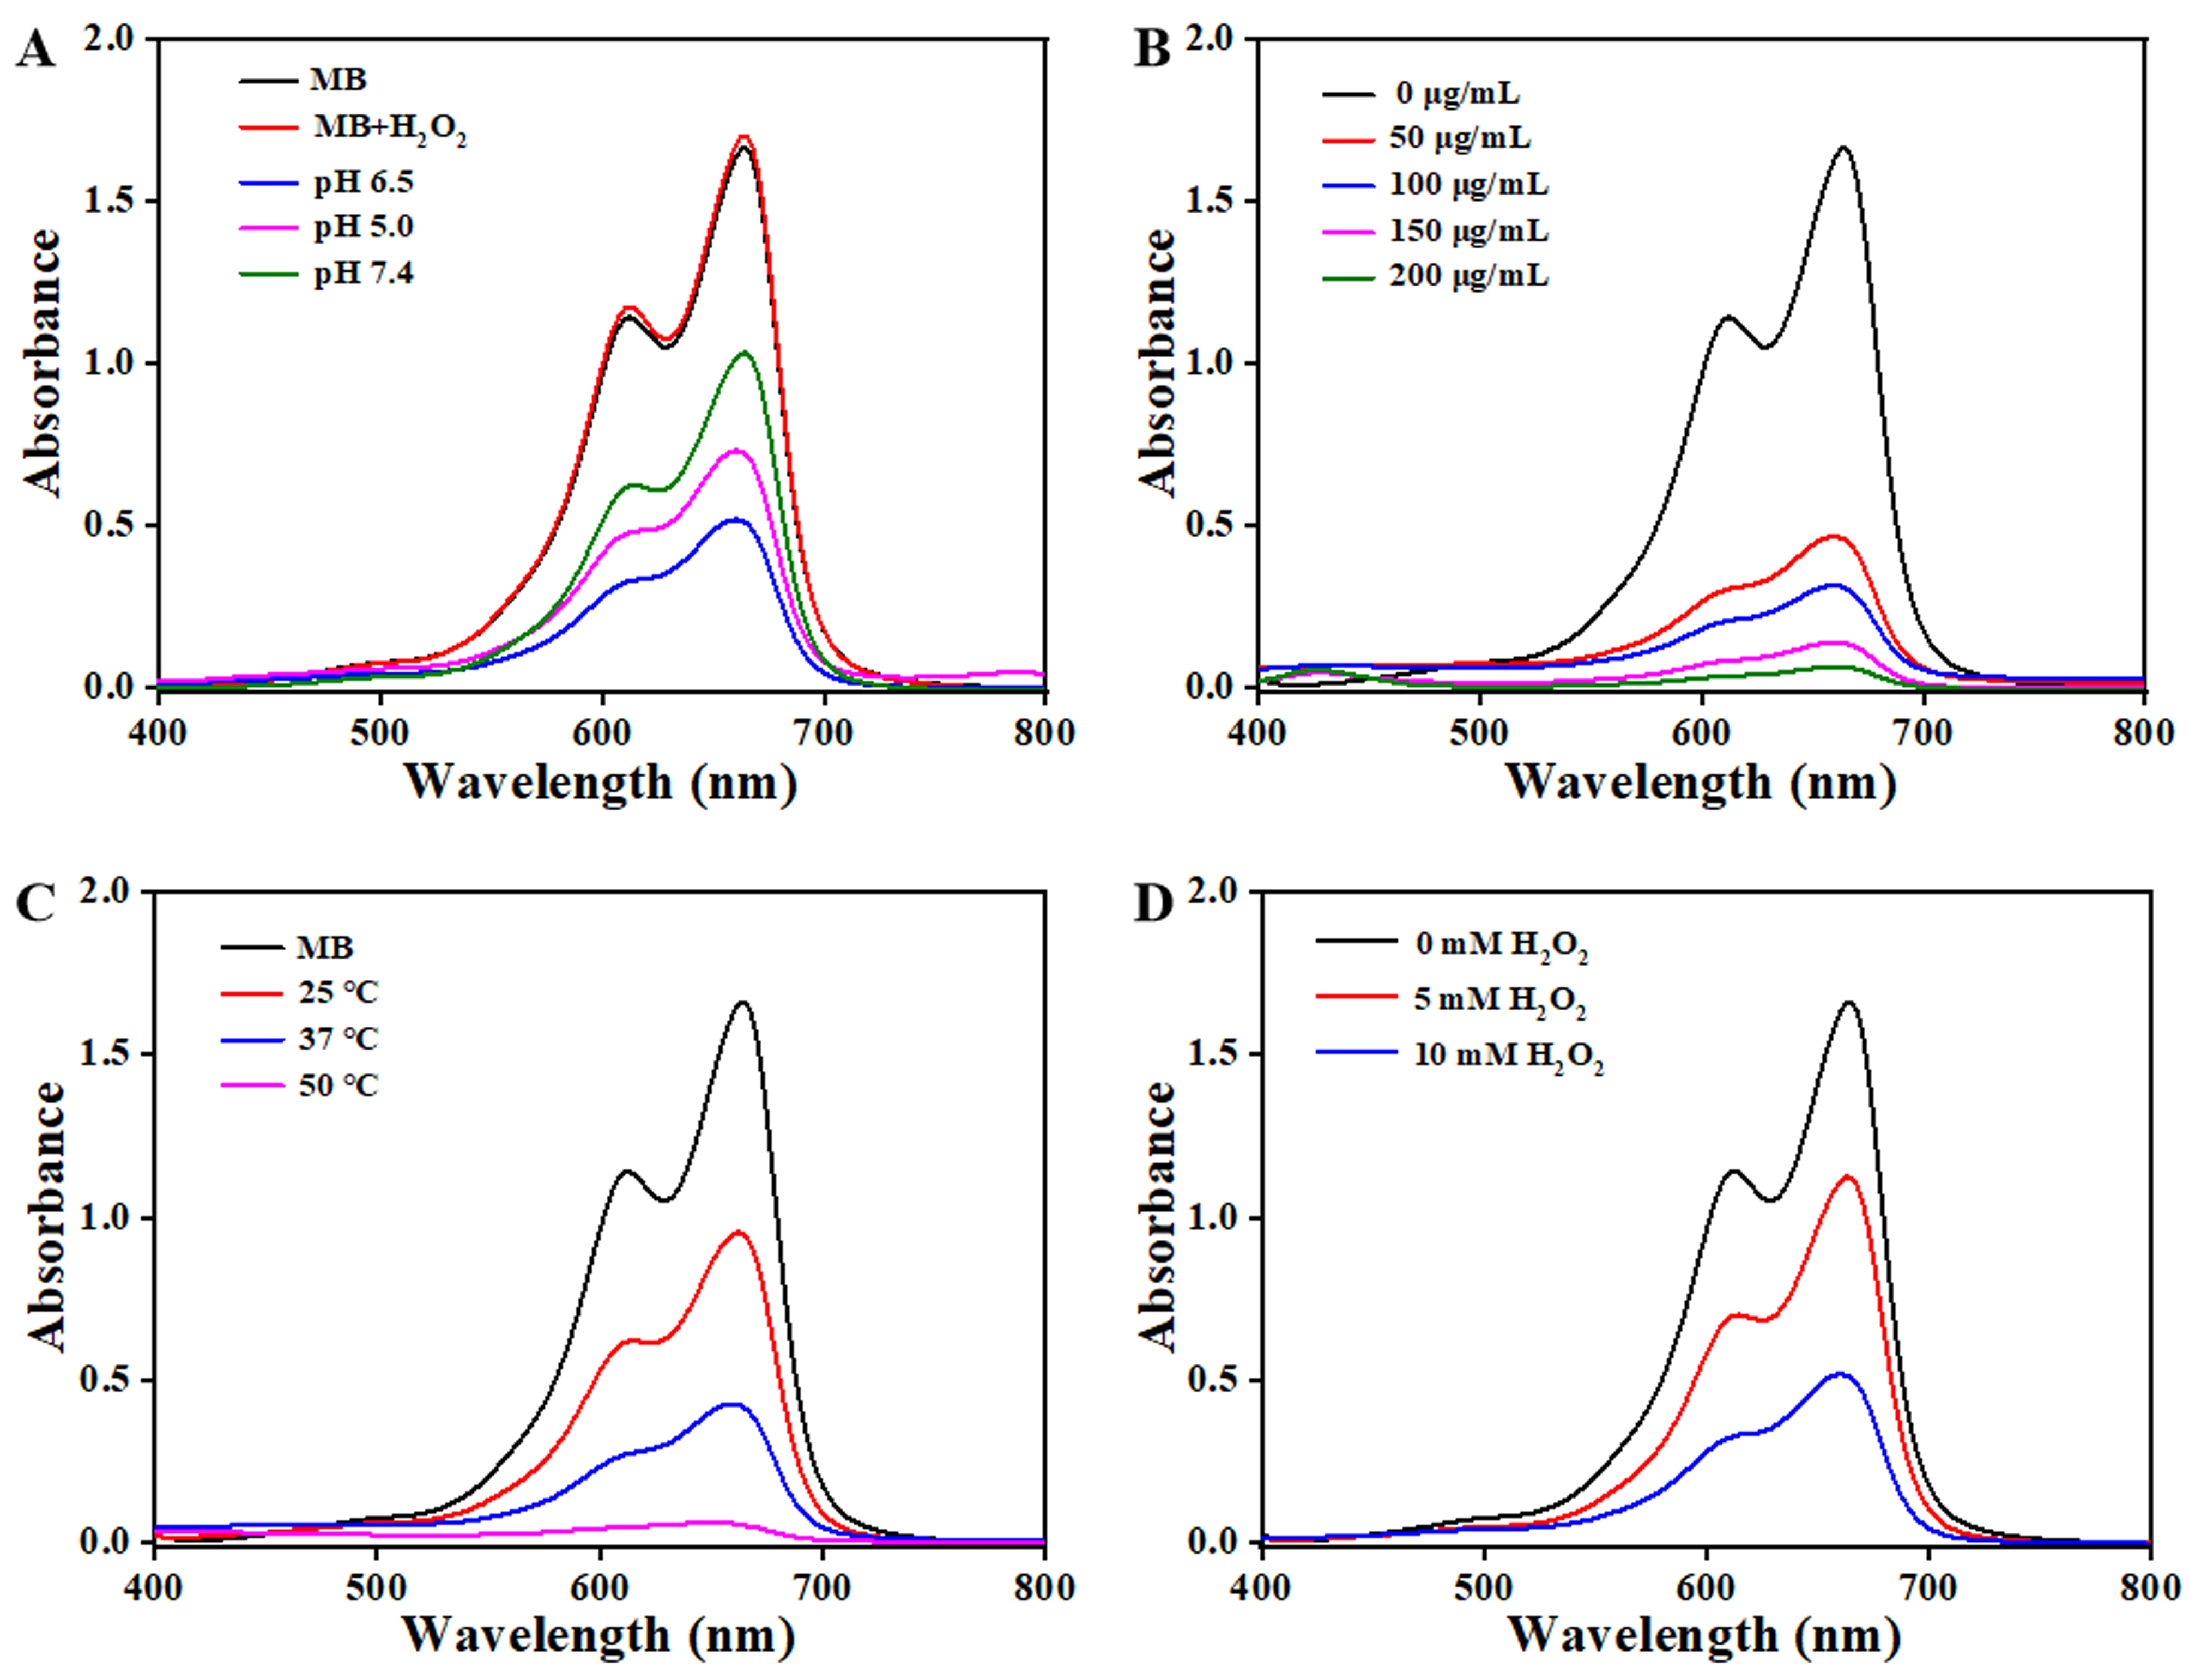
**

**Figure S4** Effects of (A) different pH, (B) different CTCH concentrations, (C) different temperature and (D) different H2O2 concentrations on MB degradation.

**
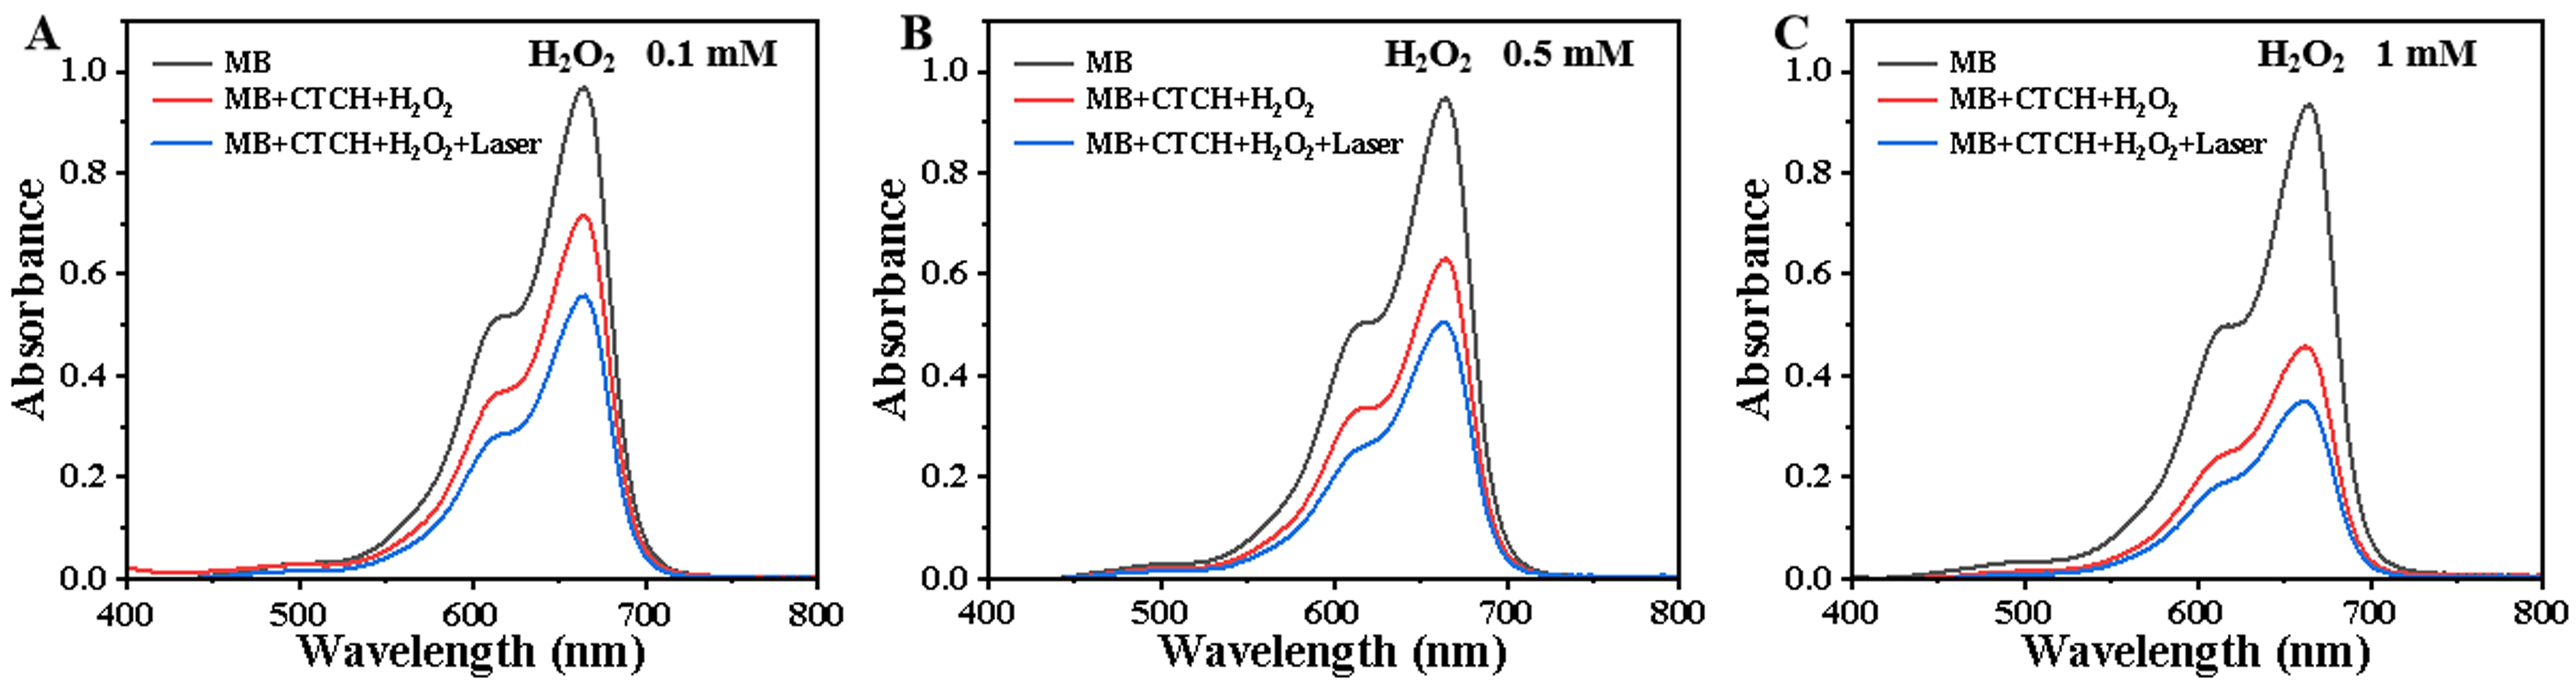
**

**Figure S5** The absorption spectra of the mixture solution of MB and CTCH in the presence of H2O2 ((A) 0.1 mM, (B) 0.5 mM, (C) 1mM) with or without 808 nm laser irradiation.

**
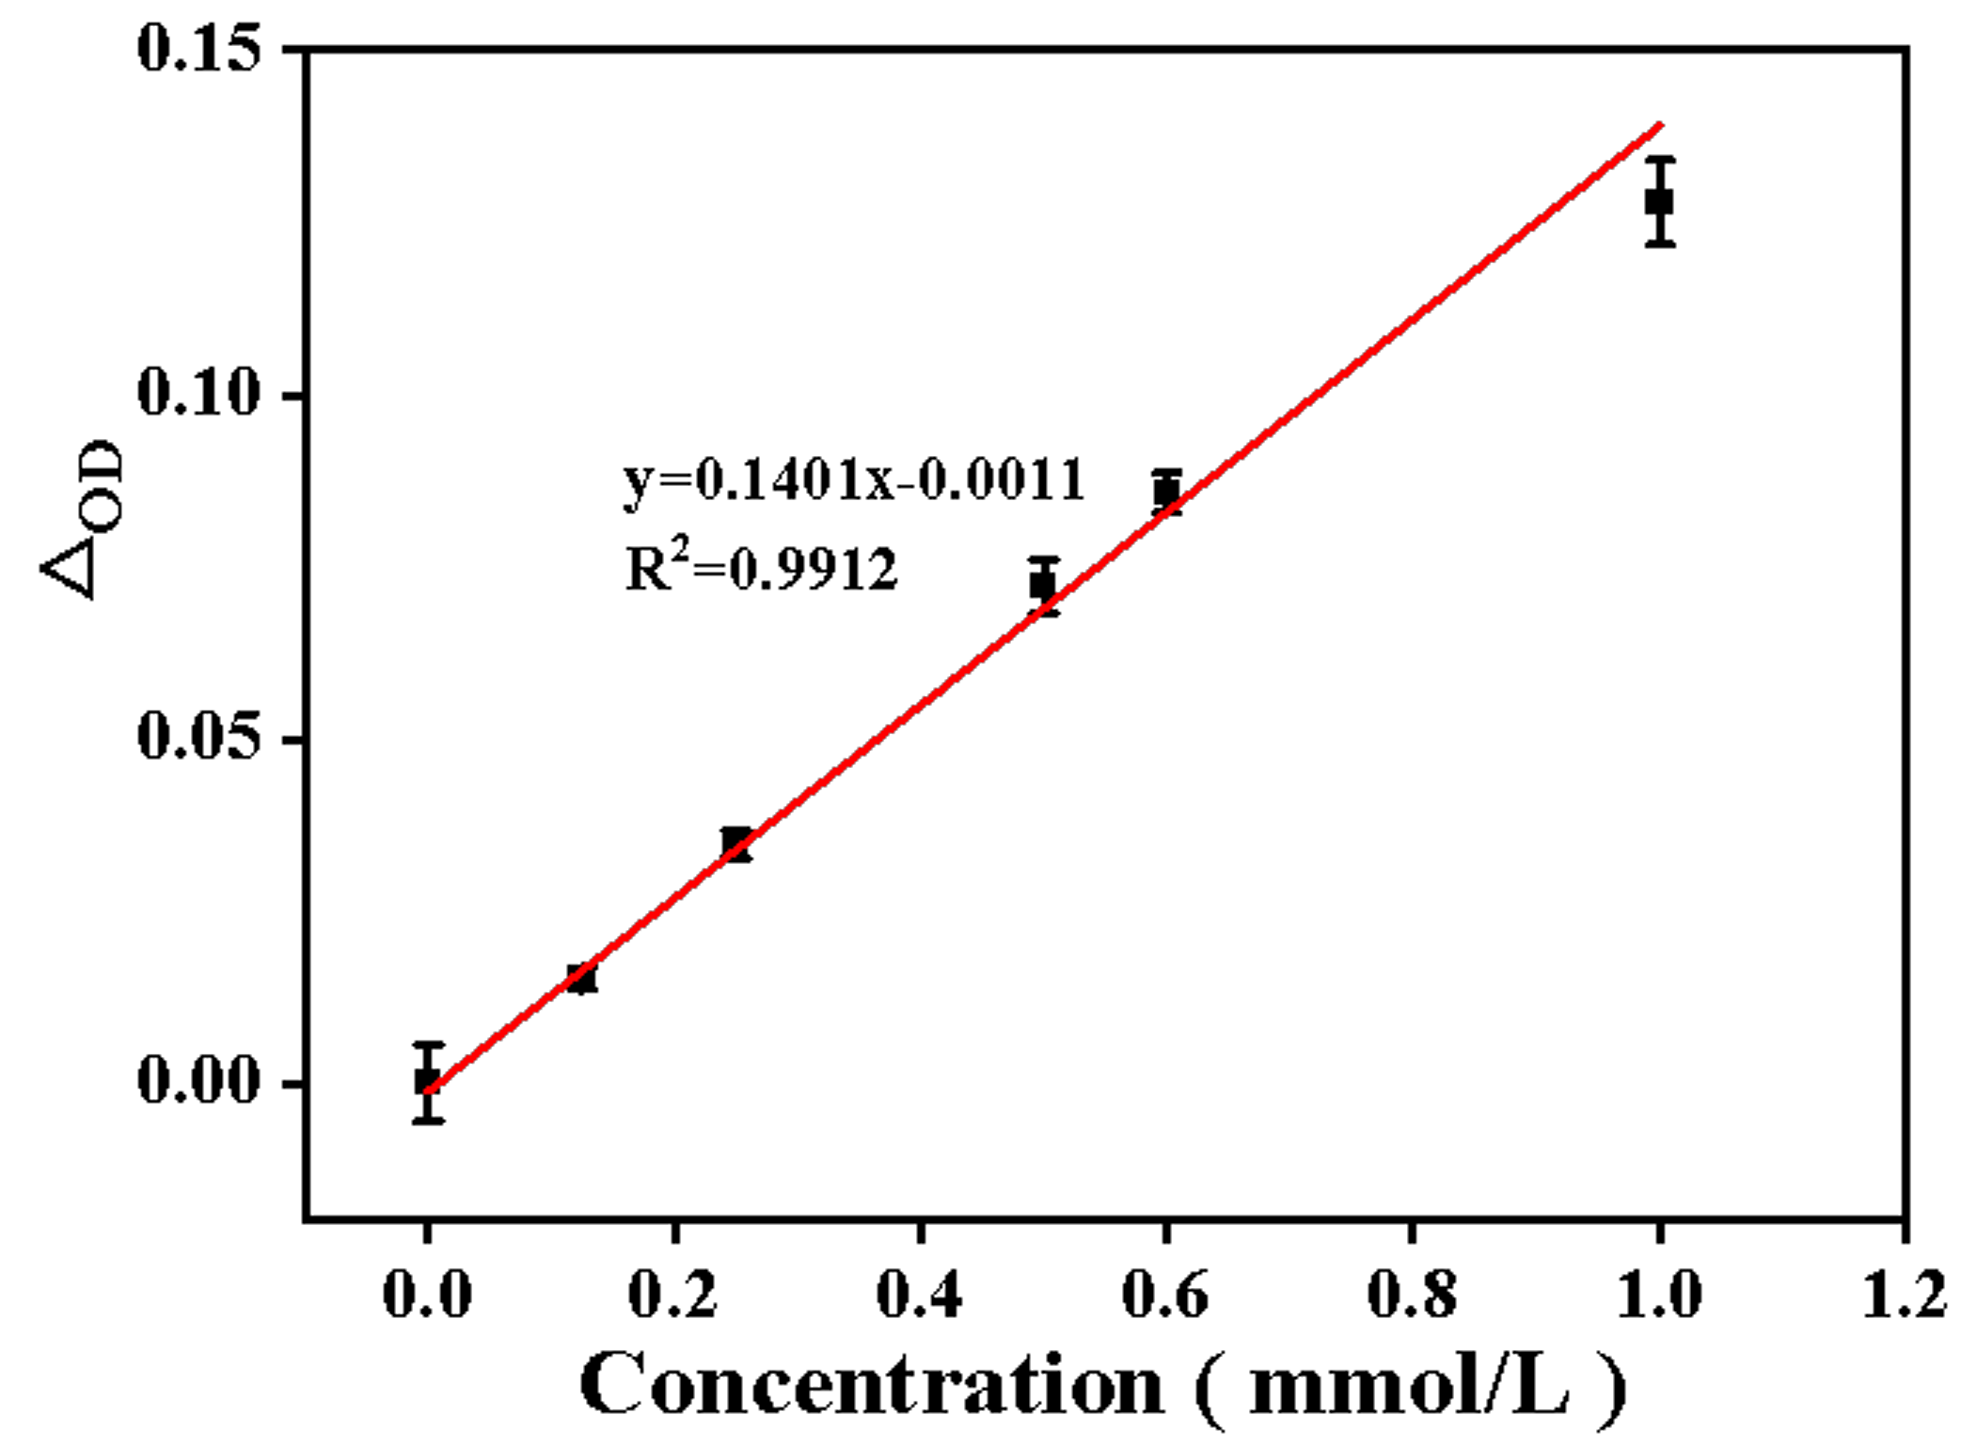
**

**Figure S6** Ca2+ standard curve.

**
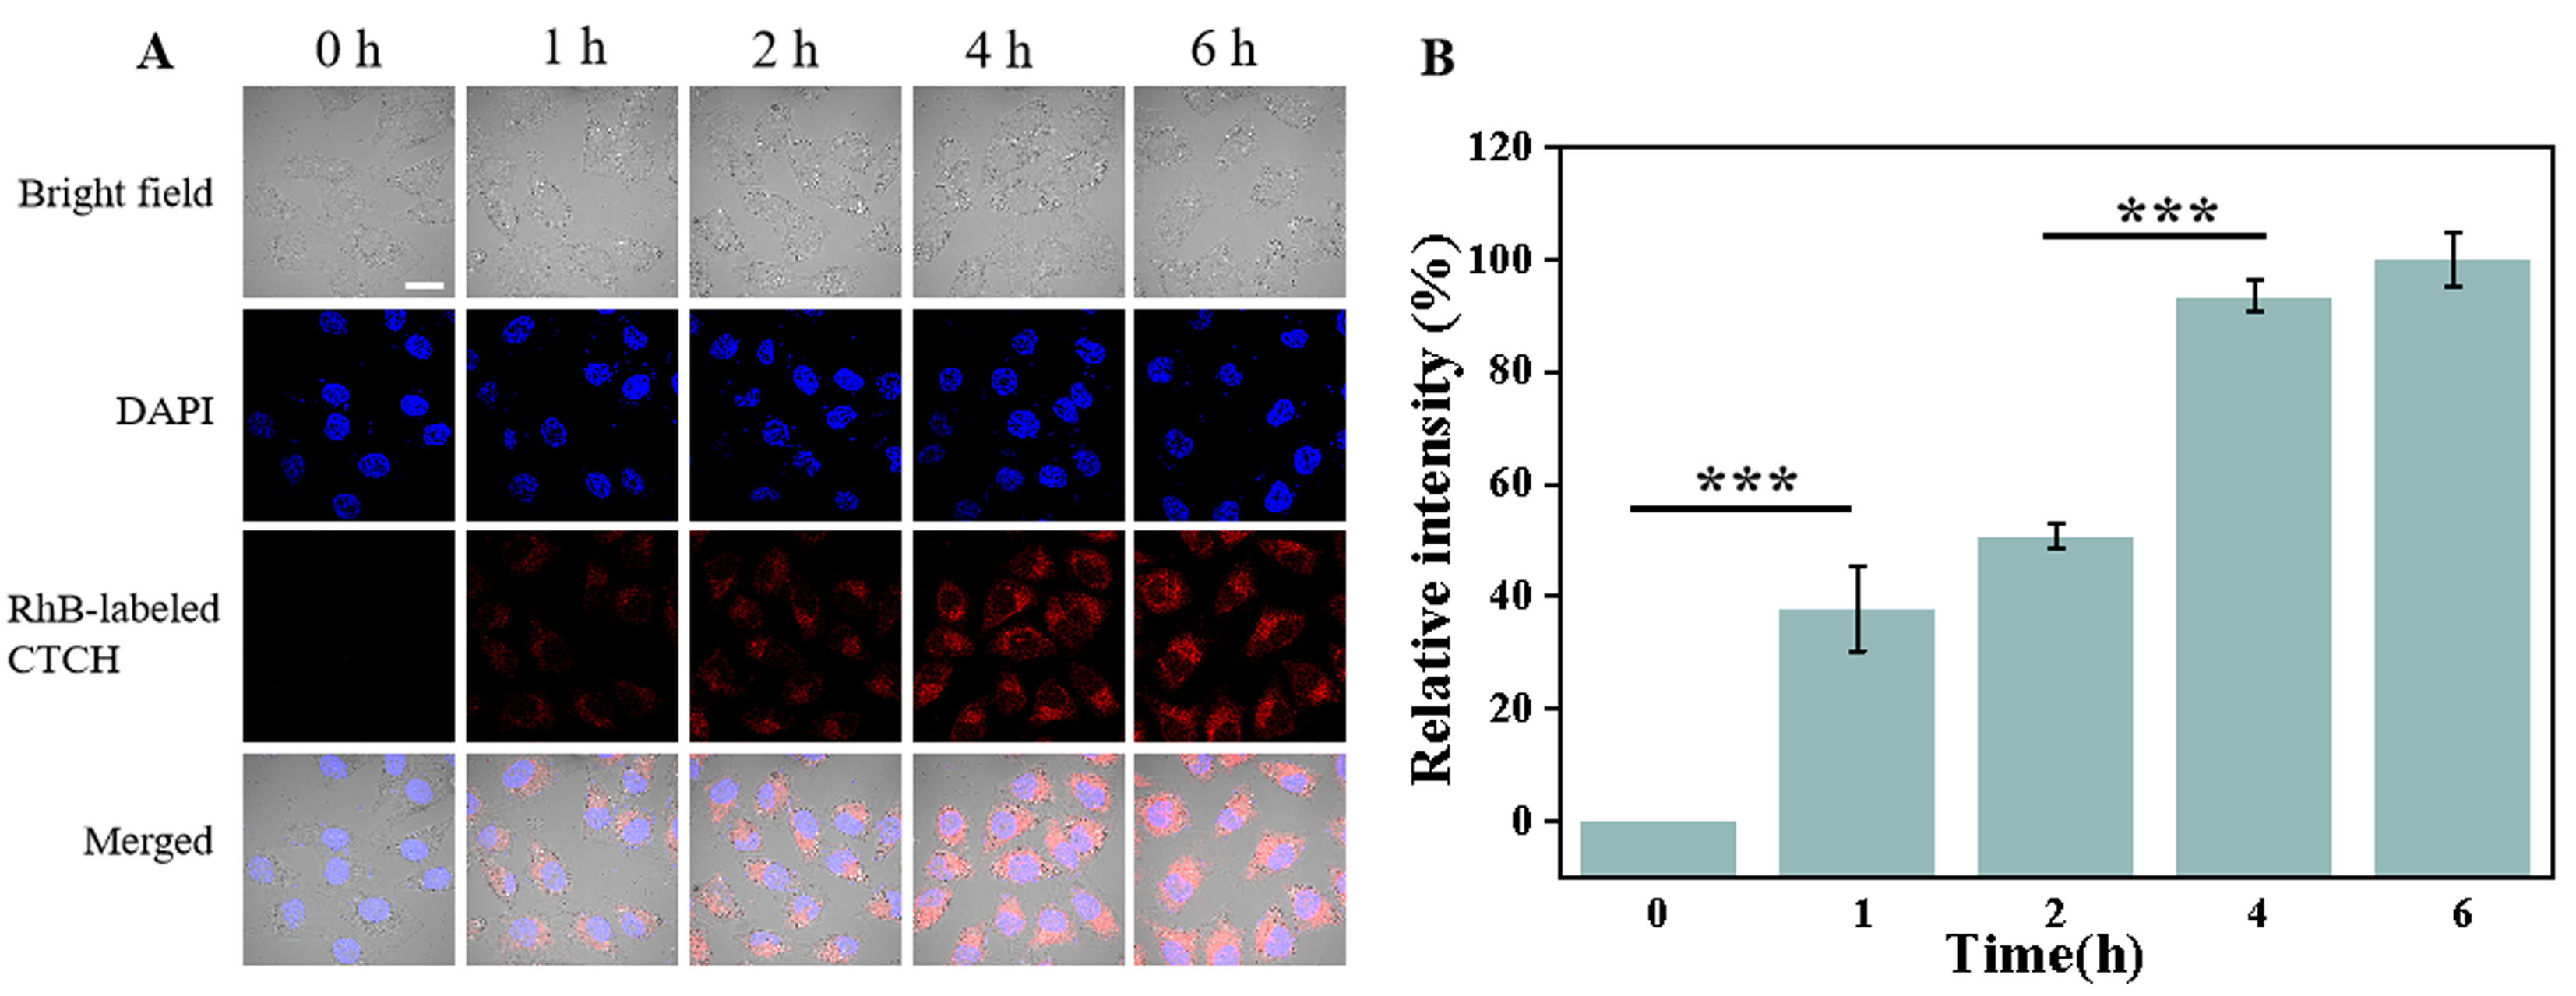
**

**Figure S7** (A) Confocal images of CTCH incubated with HeLa cells for different times (scale bar: 10 μm); (B) Fluorescence intensity statistics of red channel.****P*<0.001.

**
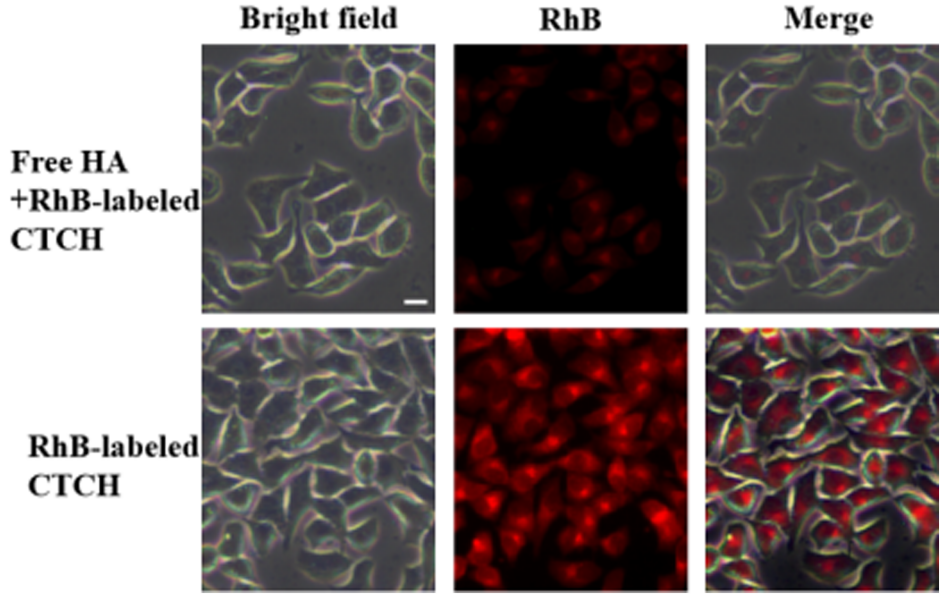
**

**Figure S8** Fluorescence images of HeLa cells pretreated with and without excess HA with RhB-labeled CTCH after 4 h (scale bar 20 μm).

**
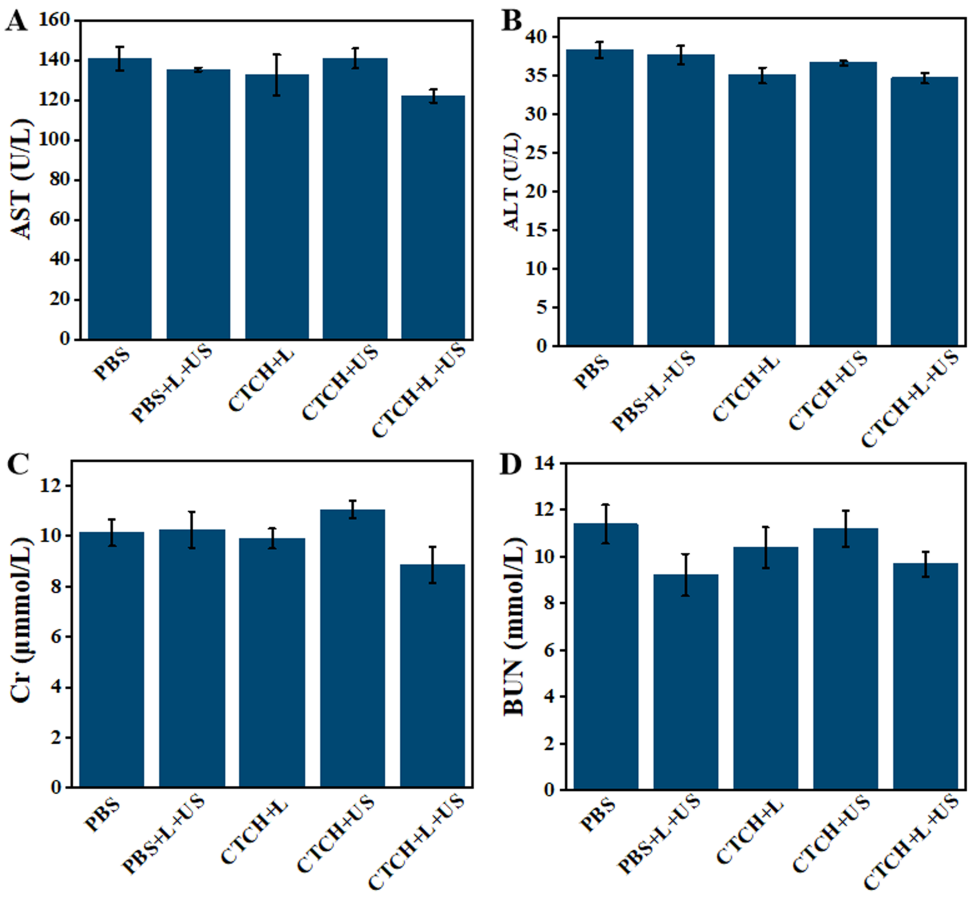
**

**Figure S9** Statistical chart of serum biochemical indices of nude mice (A) aspartate aminotransferase (AST); (B) alanine aminotransferase (ALT); (C) creatinine (Cr); (D) Urea nitrogen (BUN).

**
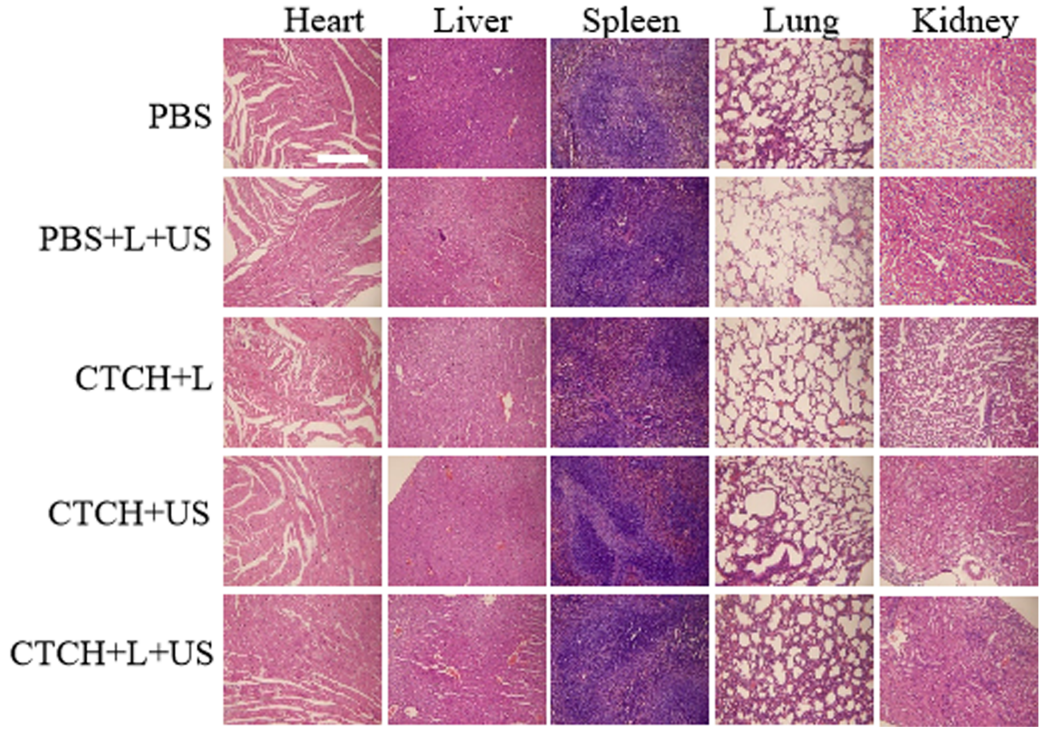
**

**Figure S10** Pathological sections of the heart, liver, spleen, lung and kidney of nude mice (scale bar: 200 μm).

**
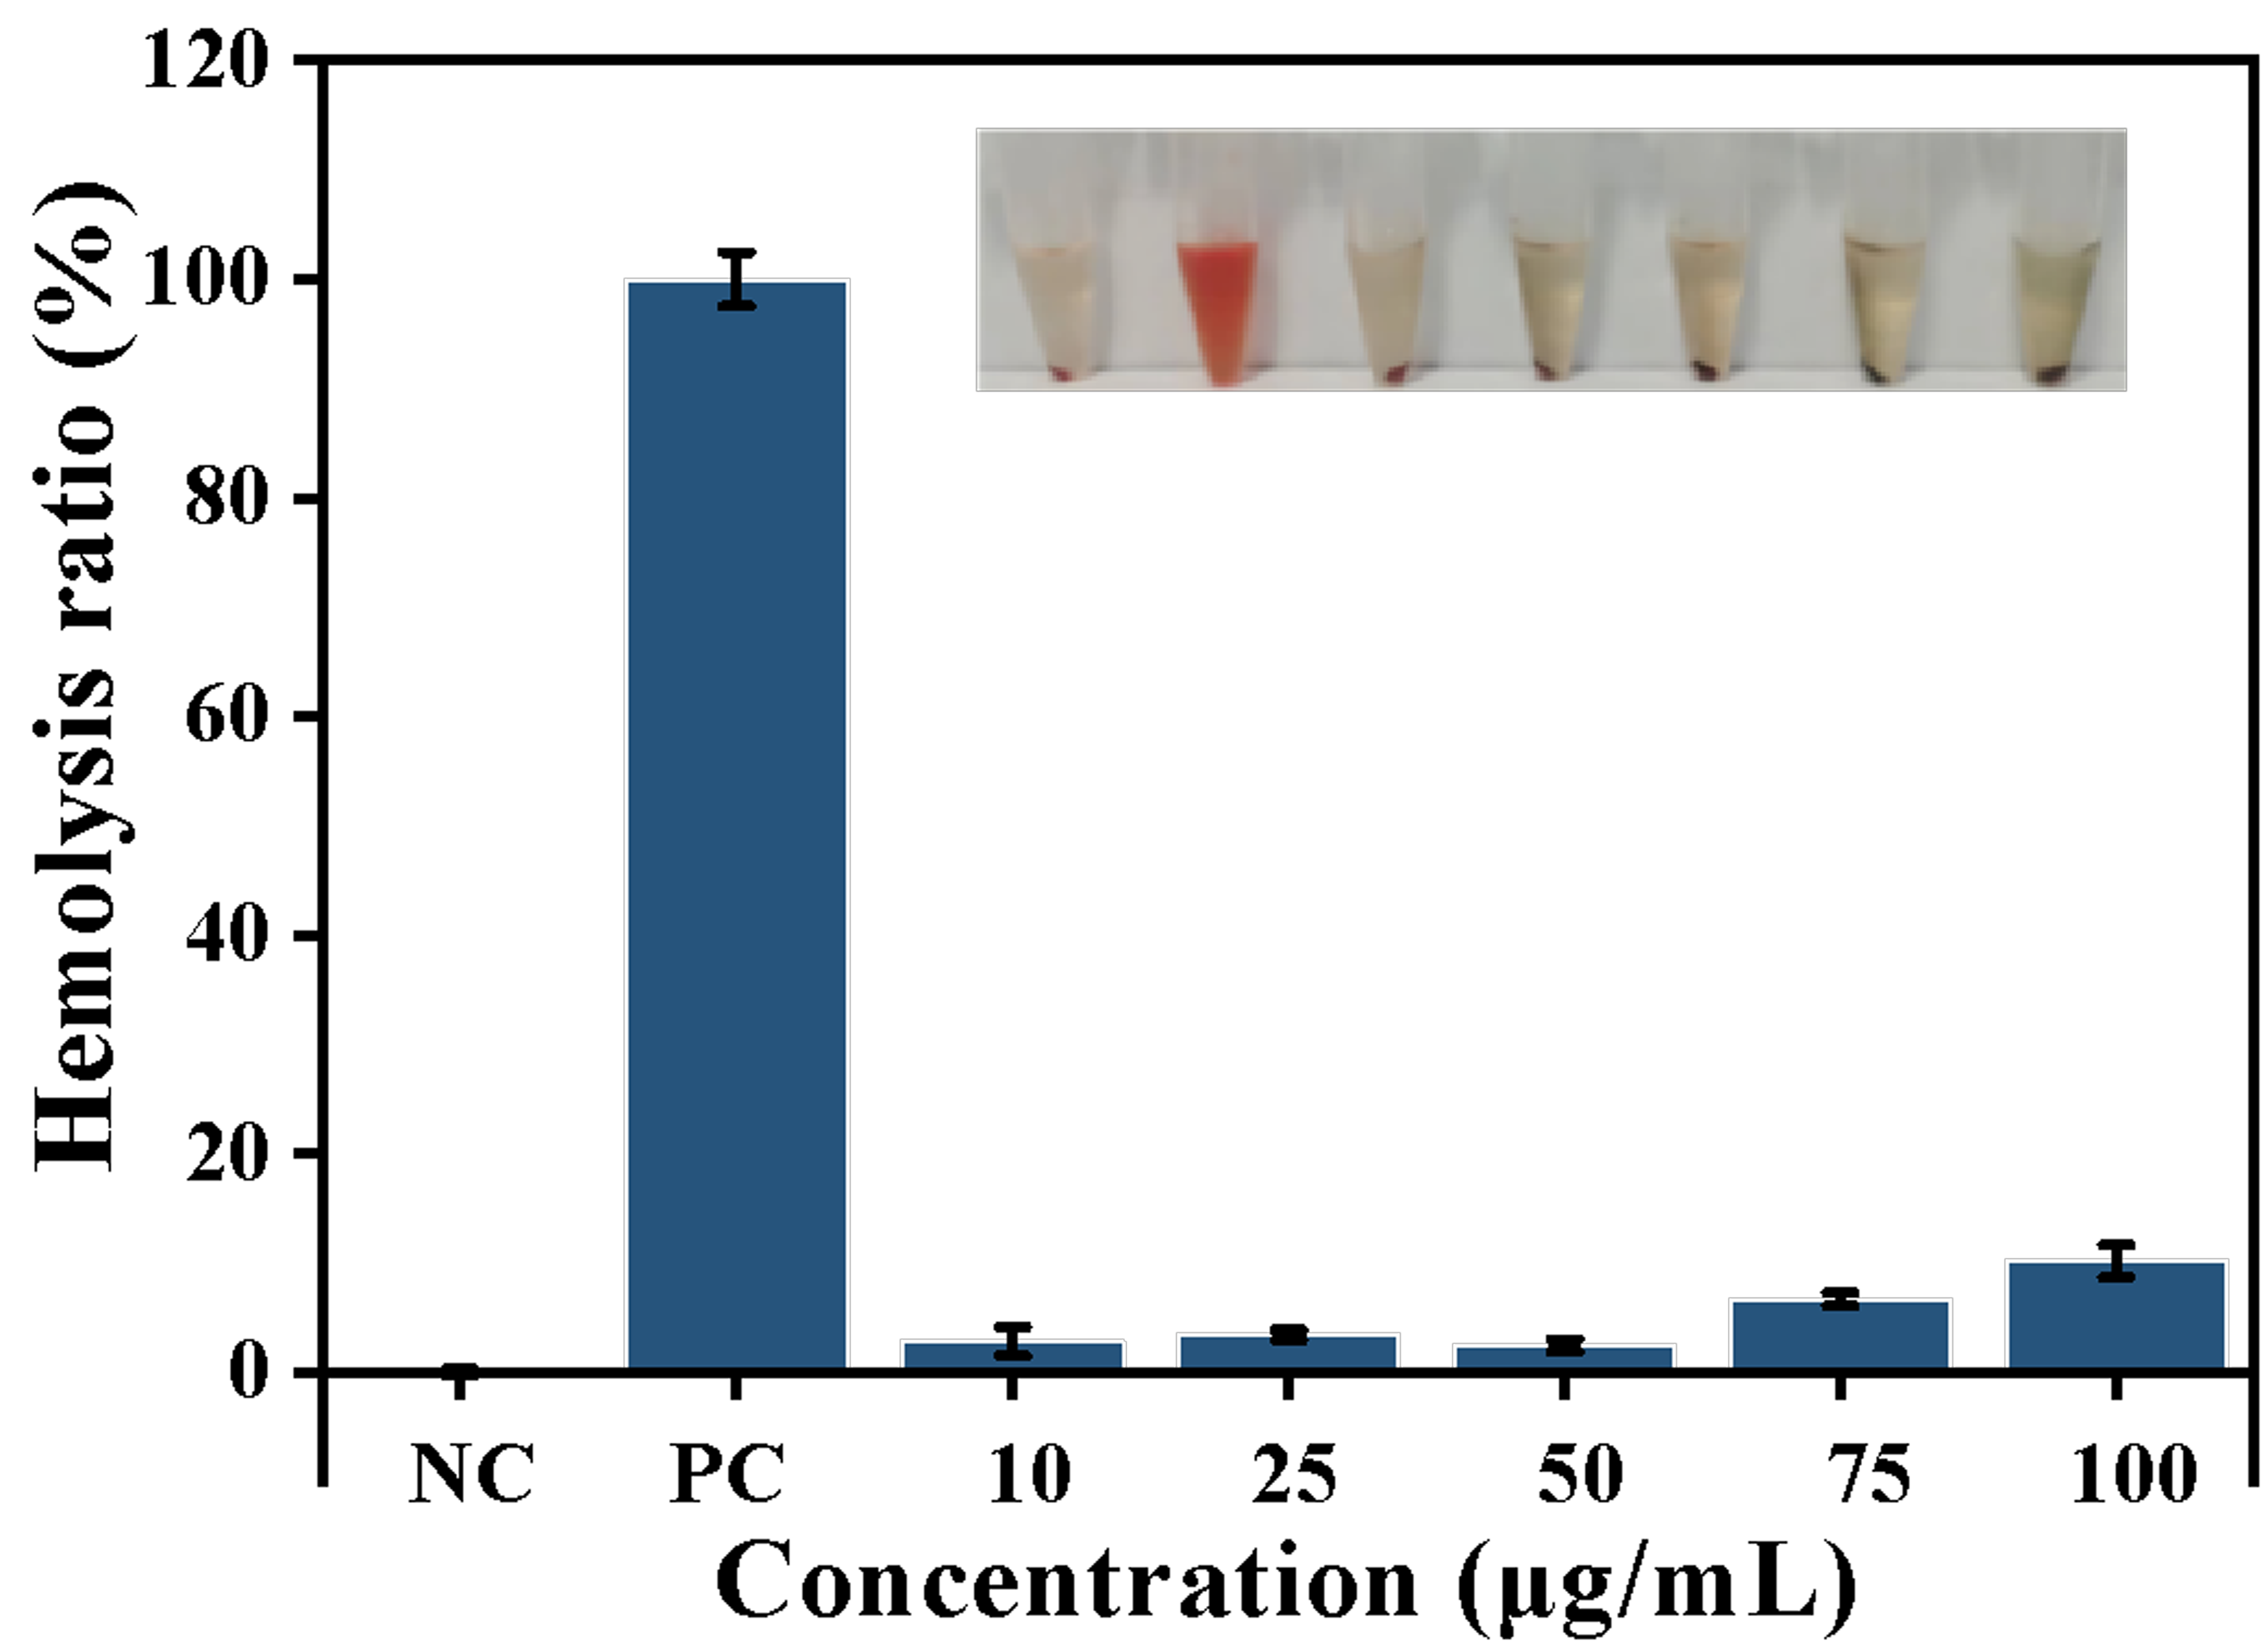
**

**Figure S11** Hemolysis ratio of CTCH at different concentrations. NC: negative control, PC: positive control.
